# Supplementary material for: Finding New Molecular Targets of Familiar Natural Products Using In Silico Target Prediction
Source: PubMed Central journal article supplement (PMC7582679; doi:10.3390/ijms21197102), 2020-09-26
Supplement: ijms-21-07102-s001.pdf [file ijms-21-07102-s001.pdf]

Article

# Finding New Molecular Targets of Familiar Natural Products Using In Silico Target Prediction

*Fabian Mayr*<sup>1</sup>, *Gabriele Möller*<sup>2</sup>, *Ulrike Garscha*<sup>3</sup>, *Jana Fischer*<sup>3</sup>, *Patricia Rodríguez Castaño*<sup>4,5</sup>, *Silvia G. Inderbinen*<sup>6</sup>, *Veronika Temml*<sup>1</sup>, *Birgit Waltenberger*<sup>1</sup>, *Stefan Schwaiger*<sup>1</sup>, *Rolf W. Hartmann*<sup>7,8</sup>, *Christian Gege*<sup>9</sup>, *Stefan Martens*<sup>10</sup>, *Alex Odermatt*<sup>6</sup>, *Amit V. Pandey*<sup>4,5</sup>, *Oliver Werz*<sup>11</sup>, *Jerzy Adamski*<sup>2,12,13</sup>, *Hermann Stuppner*<sup>1</sup> and *Daniela Schuster*<sup>14,15,\*</sup>

<sup>1</sup> Institute of Pharmacy/Pharmacognosy, Center for Molecular Biosciences Innsbruck (CMBI), University of Innsbruck, Innrain 80/82, 6020 Innsbruck, Austria

<sup>2</sup> Research Unit Molecular Endocrinology and Metabolism, Helmholtz Zentrum München, Ingolstädter Landstraße 1, 85764 Neuherberg, Germany

<sup>3</sup> Department of Pharmaceutical/Medicinal Chemistry, Institute of Pharmacy, University Greifswald, Friedrich-Ludwig-Jahn-Straße 17, 17489 Greifswald, Germany

<sup>4</sup> Pediatric Endocrinology, Diabetology, and Metabolism, University Children's Hospital Bern, Freiburgstrasse 15, 3010 Bern, Switzerland

<sup>5</sup> Department of Biomedical Research, University of Bern, Freiburgstrasse 15, 3010 Bern, Switzerland

<sup>6</sup> Division of Molecular and Systems Toxicology, Department of Pharmaceutical Sciences, University of Basel, Klingelbergstrasse 50, 4056 Basel, Switzerland

<sup>7</sup> Helmholtz Institut für Pharmazeutische Forschung, Department für Drug Design und Optimierung, Campus E8.1, 66123 Saarbrücken, Germany

<sup>8</sup> Universität des Saarlandes, Pharmazeutische und Medizinische Chemie, Campus E8.1, 66123 Saarbrücken

<sup>9</sup> Universität Heidelberg, Medizinische Chemie, Im Neuenheimer Feld 364, 69120 Heidelberg, Germany

<sup>10</sup> Research and Innovation Centre, Fondazione Edmund Mach (FEM), Via Mach 1, 38010 San Michele all'Adige, Italy

<sup>11</sup> Department of Pharmaceutical/Medicinal Chemistry, Institute of Pharmacy, Friedrich-Schiller-University Jena, Philosophenweg 14, 07743 Jena, Germany

<sup>12</sup> Lehrstuhl für Experimentelle Genetik, Technische Universität München, Emil-Erlenmeyer-Forum 5, 85356 Freising-Weihenstephan, Germany

<sup>13</sup> Department of Biochemistry, Yong Loo Lin School of Medicine, National University of Singapore, 8 Medical Drive, Singapore 117597, Singapore

<sup>14</sup> Institute of Pharmacy, Department of Pharmaceutical and Medicinal Chemistry, Paracelsus Medical University Salzburg, Strubergasse 21, 5020 Salzburg, Austria

<sup>15</sup> Institute of Pharmacy/Pharmaceutical Chemistry, Center for Molecular Biosciences Innsbruck (CMBI), University of Innsbruck, Innrain 80/82, 6020 Innsbruck, Austria

\* Correspondence: [daniela.schuster@pmu.ac.at](mailto:daniela.schuster@pmu.ac.at); Tel.: +43-699-14420025 (A)

Received: date; Accepted: date; Published: date

## S-1. Pharmacophore models used in this study

Table S 1. Pharmacophore Models used throughout this study.

| Model Name                               | Software | UniProt entry | Ref. |
|------------------------------------------|----------|---------------|------|
| model_DS4                                | DS       | 3BHS1_HUMAN   | [1]  |
| Model_1                                  | LS       | 3BHS1_HUMAN   | [1]  |
| Model_2                                  | LS       | 3BHS1_HUMAN   | [1]  |
| AChE-1acj-tha-HBA-vers                   | DS       | ACES_HUMAN    | [2]  |
| AChE-1acj-tha-xvols                      | DS       | ACES_HUMAN    | [2]  |
| AChE-GNT-Hypo1-shape                     | DS       | ACES_HUMAN    | [2]  |
| AChE-X015-1                              | DS       | ACES_HUMAN    | [2]  |
| 17b-HSD5-1ry8-rut-1.60-x-1               | DS       | AK1C3_HUMAN   | [3]  |
| 17b-HSD5-1ry8-rut-1.60-x-1-s             | DS       | AK1C3_HUMAN   | [3]  |
| 17b-HSD5-1s2a-imm-1.70-x-1               | DS       | AK1C3_HUMAN   | [3]  |
| 17b-HSD5-1s2a-imm-1.70-x-1-s             | DS       | AK1C3_HUMAN   | [3]  |
| 17b-HSD5-1s2c-flf-1.80-x-1               | DS       | AK1C3_HUMAN   | [3]  |
| 17b-HSD5-1s2c-flf-1.80-x-1-s             | DS       | AK1C3_HUMAN   | [3]  |
| 17b-HSD5-1s2c-flf-1.80-x-2-s             | DS       | AK1C3_HUMAN   | [3]  |
| 17b-HSD5-1zq5-e04-1.30-x-1               | DS       | AK1C3_HUMAN   | [3]  |
| 17b-HSD5-1zq5-e04-1.30-x-1-s             | DS       | AK1C3_HUMAN   | [3]  |
| 17b-HSD5-1zq5-e04-1.30-x-2-s             | DS       | AK1C3_HUMAN   | [3]  |
| 17b-HSD5-2f38-15m-2.00-x-1-s             | DS       | AK1C3_HUMAN   | [3]  |
| 17b-HSD5-X009-1                          | DS       | AK1C3_HUMAN   | [3]  |
| 17b-HSD5-X009-2                          | DS       | AK1C3_HUMAN   | [3]  |
| FLAPophore6exclu_LS3-03                  | LS       | AL5AP_HUMAN   | [4]  |
| FLAPophore7exclu_LS3-03                  | LS       | AL5AP_HUMAN   | [4]  |
| LS3.12-CYP11B1_2T_D-1-8                  | LS       | C11B1_HUMAN   | [5]  |
| LS3.12-CYP11B1_2T_D-1-8_refined-Veronika | LS       | C11B1_HUMAN   | [5]  |
| LS3.12-CYP11B2_C-1-5                     | LS       | C11B2_HUMAN   | [5]  |
| LS3.12-CYP11B2_C-1-5_refined-Veronika    | LS       | C11B2_HUMAN   | [5]  |

|                                                    |    |             |     |
|----------------------------------------------------|----|-------------|-----|
| CYP17_3RUK_LS4_03_MA                               | LS | CP17A_HUMAN | 1   |
| CYP17_Abi_Orteronel_LS4_03_MA                      | LS | CP17A_HUMAN | 1   |
| aromatase-X006-1                                   | DS | CP19A_HUMAN | [6] |
| aromatase-X006-2                                   | DS | CP19A_HUMAN | [6] |
| aromatase-X006-3                                   | DS | CP19A_HUMAN | [6] |
| CYP2D6-quant-X012-1                                | DS | CP2D6_HUMAN | [7] |
| CYP2D6-X012-2                                      | DS | CP2D6_HUMAN | [7] |
| CYP2D6-X012-3                                      | DS | CP2D6_HUMAN | [7] |
| CYP2D6-X012-41                                     | DS | CP2D6_HUMAN | [7] |
| CYP2D6-X012-42                                     | DS | CP2D6_HUMAN | [7] |
| LS3-03b-17b-HSD2-model6-refined                    | LS | DHB2_HUMAN  | [8] |
| LS3-03b-17b-HSD2-specific-model-12                 | LS | DHB2_HUMAN  | [8] |
| LS3-03b-17b-HSD2-specific-model-6                  | LS | DHB2_HUMAN  | [8] |
| LS3-03b-17b-HSD2-specific-model-8                  | LS | DHB2_HUMAN  | [8] |
| 17b-HSD3-DS-model-1-X007-1                         | DS | DHB3_HUMAN  | [3] |
| 17b-HSD3-DS-model-2-X007-31                        | DS | DHB3_HUMAN  | [3] |
| 17b-HSD3-LS3-1-317364-65-1-and-317364-71-9-model-4 | LS | DHB3_HUMAN  | [3] |
| 17b-HSD3-LS3-1-317364-65-1-and-317364-71-9-model-5 | LS | DHB3_HUMAN  | [3] |
| 17b-HSD3-LS3-1-875895-55-9-875895-40-2-model-1     | LS | DHB3_HUMAN  | [3] |
| 17b-HSD3-LS3-1-Benzophenone-1-919118-27-7-model-1  | LS | DHB3_HUMAN  | [3] |
| 17b-HSD3-LS3-1-Harada-2012-19-Fink-18m-model-4     | LS | DHB3_HUMAN  | [3] |
| 17b-HSD3-LS3-1-Harada-2012-19-Fink-18m-model-7     | LS | DHB3_HUMAN  | [3] |
| 17b-HSD4-Quercetin-Wetzel-final                    | DS | DHB4_HUMAN  | [3] |
| 17b-HSD4-Quercetin-Wetzel-HBA-F-model3-2           | DS | DHB4_HUMAN  | [3] |
| 17b-HSD4-Quercetin-Wetzel-HBA-F-model8-1           | DS | DHB4_HUMAN  | [3] |
| 17b-HSD4-Quercetin-Wetzel-model-4-final-LS3-1      | LS | DHB4_HUMAN  | [3] |
| 17b-HSD7-Fiala-DS-shapemodell_30                   | DS | DHB7_HUMAN  | [9] |
| 17b-HSD7-Fiala-DS-shapemodell_42                   | DS | DHB7_HUMAN  | [9] |
| 17b-HSD7-Fiala-DS-shapemodell_43                   | DS | DHB7_HUMAN  | [9] |
| 17b-HSD7-Fiala-DS-shapemodell_49                   | DS | DHB7_HUMAN  | [9] |
| LS4-09-17b-HSD7-Fiala-model2-1                     | LS | DHB7_HUMAN  | [9] |

---

|                                         |    |            |      |
|-----------------------------------------|----|------------|------|
| LS4-09-17b-HSD7-Fiala-model4-1          | LS | DHB7_HUMAN | [9]  |
| 11b-HSD-1-refinedX005-1-HBA-model4new   | DS | DHI1_HUMAN | [10] |
| 11b-HSD1-X005-1-HBA-ohneShape-model4    | DS | DHI1_HUMAN | [10] |
| 11b-HSD1-X005-1-model1                  | DS | DHI1_HUMAN | [10] |
| 11b-HSD-triterpenes-common-features     | DS | DHI1_HUMAN | [10] |
| 11b-HSD2-refinedX005-2-model2new        | DS | DHI2_HUMAN | [11] |
| 11b-HSD2-X005-2-model2                  | DS | DHI2_HUMAN | [11] |
| LS3-03a-11bHSD2-model3                  | LS | DHI2_HUMAN | [11] |
| LS3-03a11bHSD2-model5                   | LS | DHI2_HUMAN | [11] |
| LS3-03a-refined-11b-HSD2model-model3new | LS | DHI2_HUMAN | [11] |
| LS3-03a-refined-11bHSD2-model-model5new | LS | DHI2_HUMAN | [11] |
| ERa-antagonist-LS3-01-model584          | LS | ESR1_HUMAN | [12] |
| ERa-antagonist-LS3-01-model585          | LS | ESR1_HUMAN | [12] |
| ERa-antagonist-LS3-01-model586          | LS | ESR1_HUMAN | [12] |
| ER-agonist-LS3-01-model009              | LS | ESR1_HUMAN | [12] |
| ER-agonist-LS3-01-model022              | LS | ESR1_HUMAN | [12] |
| ER-agonist-LS3-01-model030              | LS | ESR1_HUMAN | [12] |
| ER-agonist-LS3-01-model040              | LS | ESR1_HUMAN | [12] |
| ER-agonist-LS3-01-model042              | LS | ESR1_HUMAN | [12] |
| ER-agonist-LS3-01-model047              | LS | ESR1_HUMAN | [12] |
| ER-agonist-LS3-01-model052              | LS | ESR1_HUMAN | [12] |
| ER-agonist-LS3-01-model062              | LS | ESR1_HUMAN | [12] |
| ER-agonist-LS3-01-model069              | LS | ESR1_HUMAN | [12] |
| ER-agonist-LS3-01-model073              | LS | ESR1_HUMAN | [12] |
| ER-agonist-LS3-01-model084              | LS | ESR1_HUMAN | [12] |
| ER-agonist-LS3-01-model087              | LS | ESR1_HUMAN | [12] |
| ER-agonist-LS3-01-model099              | LS | ESR1_HUMAN | [12] |
| ER-antagonist-LS3-01-model567           | LS | ESR1_HUMAN | [12] |
| ER-antagonist-LS3-01-model571           | LS | ESR1_HUMAN | [12] |
| ER-antagonist-LS3-01-model572           | LS | ESR1_HUMAN | [12] |
| ER-antagonist-LS3-01-model573           | LS | ESR1_HUMAN | [12] |

---

---

|                                |    |            |      |
|--------------------------------|----|------------|------|
| ER-antagonist-LS3-01-model574  | LS | ESR1_HUMAN | [12] |
| ER-antagonist-LS3-01-model575  | LS | ESR1_HUMAN | [12] |
| ER-antagonist-LS3-01-model577  | LS | ESR1_HUMAN | [12] |
| ER-antagonist-LS3-01-model578  | LS | ESR1_HUMAN | [12] |
| ER-antagonist-LS3-01-model580  | LS | ESR1_HUMAN | [12] |
| ER-antagonist-LS3-01-model583  | LS | ESR1_HUMAN | [12] |
| ER-antagonist-LS3-01-model587  | LS | ESR1_HUMAN | [12] |
| ERb-agonist-LS3-01-model100    | LS | ESR2_HUMAN | [12] |
| ERb-agonist-LS3-01-model102    | LS | ESR2_HUMAN | [12] |
| ERb-agonist-LS3-01-model103    | LS | ESR2_HUMAN | [12] |
| ERb-agonist-LS3-01-model104    | LS | ESR2_HUMAN | [12] |
| ERb-antagonist-LS3-01-model567 | LS | ESR2_HUMAN | [12] |
| ERb-antagonist-LS3-01-model571 | LS | ESR2_HUMAN | [12] |
| ERb-antagonist-LS3-01-model572 | LS | ESR2_HUMAN | [12] |
| ERb-antagonist-LS3-01-model573 | LS | ESR2_HUMAN | [12] |
| ERb-antagonist-LS3-01-model574 | LS | ESR2_HUMAN | [12] |
| ERb-antagonist-LS3-01-model575 | LS | ESR2_HUMAN | [12] |
| ERb-antagonist-LS3-01-model577 | LS | ESR2_HUMAN | [12] |
| ERb-antagonist-LS3-01-model578 | LS | ESR2_HUMAN | [12] |
| ERb-antagonist-LS3-01-model580 | LS | ESR2_HUMAN | [12] |
| ERb-antagonist-LS3-01-model583 | LS | ESR2_HUMAN | [12] |
| ERb-antagonist-LS3-01-model587 | LS | ESR2_HUMAN | [12] |
| GR-1m2z-dex-2.50-T-1           | DS | GCR_HUMAN  | [13] |
| GR-1nhz-486-2.30-T-1           | DS | GCR_HUMAN  | [13] |
| GR-1nhz-486-2.30-T-2           | DS | GCR_HUMAN  | [13] |
| GR-1nhz-486-2.30-T-3           | DS | GCR_HUMAN  | [13] |
| GR-1nhz-486-2.30-T-4           | DS | GCR_HUMAN  | [13] |
| GR-1nhz-486-2.30-T-5           | DS | GCR_HUMAN  | [13] |
| GR-1p93-dex-2.70-T-1           | DS | GCR_HUMAN  | [13] |
| GR-3bqd-day-2.50-T-1           | DS | GCR_HUMAN  | [13] |
| GR-3bqd-day-2.50-T-2           | DS | GCR_HUMAN  | [13] |

---

---

|                                              |    |            |      |
|----------------------------------------------|----|------------|------|
| GR-3cld-gw6-2.84-T-1                         | DS | GCR_HUMAN  | [13] |
| GR-3e7c-866-2.15-T-1                         | DS | GCR_HUMAN  | [13] |
| GR-T001-1                                    | DS | GCR_HUMAN  | [13] |
| GR-T001-2                                    | DS | GCR_HUMAN  | [13] |
| GR-T001-3                                    | DS | GCR_HUMAN  | [13] |
| GR-T002-1                                    | DS | GCR_HUMAN  | [13] |
| GR-T002-2                                    | DS | GCR_HUMAN  | [13] |
| GR-T003-1                                    | DS | GCR_HUMAN  | [13] |
| GR-T004-1                                    | DS | GCR_HUMAN  | [13] |
| GR-T005-1                                    | DS | GCR_HUMAN  | [13] |
| GR-T006-1                                    | DS | GCR_HUMAN  | [13] |
| GR-T007-1                                    | DS | GCR_HUMAN  | [13] |
| GR-T008-1                                    | DS | GCR_HUMAN  | [13] |
| GR-T009-1                                    | DS | GCR_HUMAN  | [13] |
| GR-T010-1                                    | DS | GCR_HUMAN  | [13] |
| GR-T011-1                                    | DS | GCR_HUMAN  | [13] |
| GR-T012-1                                    | DS | GCR_HUMAN  | [13] |
| GR-T013-1                                    | DS | GCR_HUMAN  | [13] |
| GR-T014-1                                    | DS | GCR_HUMAN  | [13] |
| GR-T015-1                                    | DS | GCR_HUMAN  | [13] |
| GR-T015-2                                    | DS | GCR_HUMAN  | [13] |
| GR-T016-1                                    | DS | GCR_HUMAN  | [13] |
| GR-T017-1                                    | DS | GCR_HUMAN  | [13] |
| sEH-C12_1_DS3.5                              | DS | HYES_HUMAN | [14] |
| sEH-C15_1DS3.5                               | DS | HYES_HUMAN | [14] |
| sEH-1VJ5mod+3ANTmod_merged(Ref.3ANT)_LS_3-02 | LS | HYES_HUMAN | [14] |
| sEH-1ZD5_mod5_LS_3-02                        | LS | HYES_HUMAN | [14] |
| sEH-3ANT[A]_modifiziert_LS_3-02              | LS | HYES_HUMAN | [14] |
| sEH-3ANT+3ANTmod_merged_LS_3-02              | LS | HYES_HUMAN | [14] |
| sEH-3I1Y_mod2_LS_3-02                        | LS | HYES_HUMAN | [14] |
| sEH-3I1Y_mod4_LS_3-02                        | LS | HYES_HUMAN | [14] |

---

|                                               |    |            |      |
|-----------------------------------------------|----|------------|------|
| sEH-3KOO_mod2_LS_3-02                         | LS | HYES_HUMAN | [14] |
| sEH-3KOO_mod5_LS_3-02                         | LS | HYES_HUMAN | [14] |
| sEH-3OTQ_mod4_LS_3-02                         | LS | HYES_HUMAN | [14] |
| sEH-Cl2_Shared_mod1_LS_3-02                   | LS | HYES_HUMAN | [14] |
| 5-LO-N004-1                                   | DS | LOX5_HUMAN | [15] |
| 5-LO-N004-2                                   | DS | LOX5_HUMAN | [15] |
| 5-LO-W001-5                                   | DS | LOX5_HUMAN | [16] |
| LS4-09-5-LO-bzq_01v2                          | LS | LOX5_HUMAN | 2    |
| LS4-09-5-LO-bzq_02v2                          | LS | LOX5_HUMAN | 2    |
| LS4-09-5-LO-bzq_03v2                          | LS | LOX5_HUMAN | 2    |
| LS4-09-5-LO-bzq-02-02-16-5LOX-benzoquinone_V2 | LS | LOX5_HUMAN | 2    |
| LS4-09-5-LO-zlt-20-01-16-zileuton             | LS | LOX5_HUMAN | 2    |
| LS4-09-5-LO-zlt-20-01-16-zileuton-derivatives | LS | LOX5_HUMAN | 2    |
| MR-2a3i-c0r-1.95-Z-1                          | DS | MCR_HUMAN  | [17] |
| MR-2aa2-as4-1.95-Z-1                          | DS | MCR_HUMAN  | [17] |
| MR-2aa2-as4-1.95-Z-2                          | DS | MCR_HUMAN  | [17] |
| MR-2aa5-str-2.20-Z-1                          | DS | MCR_HUMAN  | [17] |
| MR-2oax-snl-2.29-Z-1                          | DS | MCR_HUMAN  | [17] |
| MR-Z001-1                                     | DS | MCR_HUMAN  | [17] |
| MR-Z001-2                                     | DS | MCR_HUMAN  | [17] |
| MR-Z002-1                                     | DS | MCR_HUMAN  | [17] |
| MR-Z002-2                                     | DS | MCR_HUMAN  | [17] |
| p38-MAPK-1a9u-sb2-800mod1_h                   | DS | MK14_HUMAN | [18] |
| p38-MAPK-1bl6-sb6-800mod1_h                   | DS | MK14_HUMAN | [18] |
| p38-MAPK-1bl7-sb4-800mod1_ha                  | DS | MK14_HUMAN | [18] |
| p38-MAPK-1bmk-sb5-800mod1_ha                  | DS | MK14_HUMAN | [18] |
| p38-MAPK-1ouk+shape                           | DS | MK14_HUMAN | [18] |
| p38-MAPK-1w82+shape                           | DS | MK14_HUMAN | [18] |
| p38-MAPK-1w83-1wbv+shape                      | DS | MK14_HUMAN | [18] |
| p38-MAPK-1wbvneu+shape                        | DS | MK14_HUMAN | [18] |
| p38-MAPK-2rg6-3cg2+shape                      | DS | MK14_HUMAN | [18] |

|                           |    |             |      |
|---------------------------|----|-------------|------|
| p38-MAPK-3dt1-3ctq+shape  | DS | MK14_HUMAN  | [18] |
| NFkB-DNA-site-N003-1      | DS | NFKB1_HUMAN | 1    |
| LXR-1p8d                  | DS | NR1H2_HUMAN | [19] |
| LXR-1pq6                  | DS | NR1H2_HUMAN | [19] |
| LXR-1pqc                  | DS | NR1H2_HUMAN | [19] |
| LXR-1uhl                  | DS | NR1H2_HUMAN | [19] |
| LXR-1upv                  | DS | NR1H2_HUMAN | [19] |
| LXR-1upw                  | DS | NR1H2_HUMAN | [19] |
| LXR-2acl                  | DS | NR1H2_HUMAN | [19] |
| LXR-3fal                  | DS | NR1H2_HUMAN | [19] |
| LXR-3fc6                  | DS | NR1H2_HUMAN | [19] |
| FXR-1osh-fex-1.78-d-1     | DS | NR1H4_HUMAN | [20] |
| FXR-1osh-fex-1.78-d-1-s   | DS | NR1H4_HUMAN | [20] |
| FXR-1osh-fex-1.78-d-2     | DS | NR1H4_HUMAN | [20] |
| FXR-1osh-fex-1.78-d-2-s   | DS | NR1H4_HUMAN | [20] |
| FXR-3bej-muf-1.90-x-1     | DS | NR1H4_HUMAN | [20] |
| FXR-3bej-muf-1.90-x-1-s   | DS | NR1H4_HUMAN | [20] |
| FXR-3bej-muf-1.90-x-2     | DS | NR1H4_HUMAN | [20] |
| FXR-3bej-muf-1.90-x-2-s   | DS | NR1H4_HUMAN | [20] |
| FXR-3dct-o64-2.50-x-1     | DS | NR1H4_HUMAN | [20] |
| FXR-3dct-o64-2.50-x-1-s   | DS | NR1H4_HUMAN | [20] |
| FXR-3dct-o64-2.50-x-2     | DS | NR1H4_HUMAN | [20] |
| FXR-3dct-o64-2.50-x-2-s   | DS | NR1H4_HUMAN | [20] |
| FXR-3fli-33y-2.00-x-1     | DS | NR1H4_HUMAN | [20] |
| FXR-3fli-33y-2.00-x-1-s   | DS | NR1H4_HUMAN | [20] |
| FXR-X008-1                | DS | NR1H4_HUMAN | [20] |
| cPLA2alpha-N002-2         | DS | PA2GA_HUMAN | [21] |
| COX-1-1cqe-flp-3.10-x-1   | DS | PGH1_HUMAN  | [22] |
| COX-1-1pge-isf-3.50-x-2-s | DS | PGH1_HUMAN  | [22] |
| COX-1-2ayl-flp-2.00-x-1   | DS | PGH1_HUMAN  | [22] |
| COX-1-X017-1              | DS | PGH1_HUMAN  | [22] |

---

|                           |    |             |      |
|---------------------------|----|-------------|------|
| COX-1-1EQH4_LS3-01        | LS | PGH1_HUMAN  | [23] |
| COX-1-1PGE2_LS3-01        | LS | PGH1_HUMAN  | [23] |
| COX-1-1PGG2_LS3-01        | LS | PGH1_HUMAN  | [23] |
| COX-1-2AYL3_LS3-01        | LS | PGH1_HUMAN  | [23] |
| COX-1-2OYU2_LS3-01        | LS | PGH1_HUMAN  | [23] |
| COX-2-4cox-imn-2.90-x-2   | DS | PGH2_HUMAN  | [22] |
| COX-2-6cox-s58-2.80-x-1-s | DS | PGH2_HUMAN  | [22] |
| COX-2-3ln11_LS3-01        | LS | PGH2_HUMAN  | [23] |
| COX-2-3NTB1_LS3-01        | LS | PGH2_HUMAN  | [23] |
| COX-2-4COX2_LS3-01        | LS | PGH2_HUMAN  | [23] |
| COX-2-6COX3_LS3-01        | LS | PGH2_HUMAN  | [23] |
| PPARa-1i7g-az2-2.24-x-1   | DS | PPARA_HUMAN | [24] |
| PPARa-1i7g-az2-2.24-x-1-s | DS | PPARA_HUMAN | [24] |
| PPARa-1i7g-az2-2.24-x-2   | DS | PPARA_HUMAN | [24] |
| PPARa-1k7l-544-2.50-p-1   | DS | PPARA_HUMAN | [24] |
| PPARa-1k7l-544-2.50-p-1-s | DS | PPARA_HUMAN | [24] |
| PPARa-1k7l-544-2.50-p-2   | DS | PPARA_HUMAN | [24] |
| PPARa-1k7l-544-2.50-p-2-s | DS | PPARA_HUMAN | [24] |
| PPARa-1kkq-471-3.00-x-1   | DS | PPARA_HUMAN | [24] |
| PPARa-1kkq-471-3.00-x-1-s | DS | PPARA_HUMAN | [24] |
| PPARa-P007-1              | DS | PPARA_HUMAN | [24] |
| PPARd-1gwx-433-2.50-p-1   | DS | PPARD_HUMAN | [24] |
| PPARd-1gwx-433-2.50-p-1-s | DS | PPARD_HUMAN | [24] |
| PPARd-1y0s-331-2.65-p-1   | DS | PPARD_HUMAN | [24] |
| PPARd-1y0s-331-2.65-p-1-s | DS | PPARD_HUMAN | [24] |
| PPARd-1y0s-331-2.65-p-2-s | DS | PPARD_HUMAN | [24] |
| PPARd-1y0s-331-2.65-p-3   | DS | PPARD_HUMAN | [24] |
| PPARd-1y0s-331-2.65-p-3-s | DS | PPARD_HUMAN | [24] |
| PPARd-2awh-vca-2.00-p-1-s | DS | PPARD_HUMAN | [24] |
| PPARd-2awh-vca-2.00-p-2   | DS | PPARD_HUMAN | [24] |
| PPARd-2awh-vca-2.00-p-2-s | DS | PPARD_HUMAN | [24] |

---

---

|                           |    |             |      |
|---------------------------|----|-------------|------|
| PPARd-2b50-vca-2.00-p-1-s | DS | PPARD_HUMAN | [24] |
| PPARd-2b50-vca-2.00-p-2   | DS | PPARD_HUMAN | [24] |
| PPARd-2b50-vca-2.00-p-2-s | DS | PPARD_HUMAN | [24] |
| PPARd-2baw-vca-2.30-p-1-s | DS | PPARD_HUMAN | [24] |
| PPARd-2j14-gni-2.80-p-1-s | DS | PPARD_HUMAN | [24] |
| PPARd-3gwx-epa-2.40-p-1-s | DS | PPARD_HUMAN | [24] |
| PPARd-3gwx-epa-2.40-p-2-s | DS | PPARD_HUMAN | [24] |
| PPARg-1fm6-brl-2.10-p-1   | DS | PPARG_HUMAN | [24] |
| PPARg-1fm6-brl-2.10-p-1-s | DS | PPARG_HUMAN | [24] |
| PPARg-1fm9-570-2.10-x-1   | DS | PPARG_HUMAN | [24] |
| PPARg-1fm9-570-2.10-x-1-s | DS | PPARG_HUMAN | [24] |
| PPARg-1fm9-570-2.10-x-2   | DS | PPARG_HUMAN | [24] |
| PPARg-1fm9-570-2.10-x-2-s | DS | PPARG_HUMAN | [24] |
| PPARg-1i7i-az2-2.35-x-1   | DS | PPARG_HUMAN | [24] |
| PPARg-1i7i-az2-2.35-x-1-s | DS | PPARG_HUMAN | [24] |
| PPARg-1k74-544-2.30-p-1-s | DS | PPARG_HUMAN | [24] |
| PPARg-1knu-ypa-2.50-p-1-s | DS | PPARG_HUMAN | [24] |
| PPARg-1knu-ypa-2.50-p-2-s | DS | PPARG_HUMAN | [24] |
| PPARg-1nyx-drf-2.65-p-1   | DS | PPARG_HUMAN | [24] |
| PPARg-1nyx-drf-2.65-p-1-s | DS | PPARG_HUMAN | [24] |
| PPARg-1nyx-drf-2.65-p-2-s | DS | PPARG_HUMAN | [24] |
| PPARg-1wm0-plb-2.90-p-1-s | DS | PPARG_HUMAN | [24] |
| PPARg-1zeo-c01-2.50-p-1   | DS | PPARG_HUMAN | [24] |
| PPARg-1zeo-c01-2.50-p-1-s | DS | PPARG_HUMAN | [24] |
| PPARg-1zgy-brl-1.80-p-1-s | DS | PPARG_HUMAN | [24] |
| PPARg-2ath-3ea-2.28-p-1-s | DS | PPARG_HUMAN | [24] |
| PPARg-2f4b-eha-2.07-p-1-s | DS | PPARG_HUMAN | [24] |
| PPARg-2fvj-ro0-1.99-p-1-s | DS | PPARG_HUMAN | [24] |
| PPARg-2g0g-sp0-2.54-p-1   | DS | PPARG_HUMAN | [24] |
| PPARg-2g0g-sp0-2.54-p-1-s | DS | PPARG_HUMAN | [24] |
| PPARg-2g0h-sp3-2.30-p-1-s | DS | PPARG_HUMAN | [24] |

---

---

|                               |    |             |      |
|-------------------------------|----|-------------|------|
| PPARg-2gtk-208-2.10-p-1-s     | DS | PPARG_HUMAN | [24] |
| PPARg-2hfp-nsi-2.00-p-1-s     | DS | PPARG_HUMAN | [24] |
| PPARg-2prg-brl-2.30-p-1       | DS | PPARG_HUMAN | [24] |
| PPARg-2prg-brl-2.30-p-1-s     | DS | PPARG_HUMAN | [24] |
| PPARg-2q59-240-2.20-p-1-s     | DS | PPARG_HUMAN | [24] |
| PPARg-4prg-072-2.90-p-1-s     | DS | PPARG_HUMAN | [24] |
| PPARg-P002-1                  | DS | PPARG_HUMAN | [24] |
| mPGES-1-Hypo_62_01-non-acidic | DS | PTGES_HUMAN | [25] |
| mPGES-1-X019-1                | DS | PTGES_HUMAN | [25] |
| mPGES-1-X019-2                | DS | PTGES_HUMAN | [25] |
| mPGES-1-model-LS3-01          | LS | PTGES_HUMAN | [25] |
| PTP1b-1bzc-tpi-2.35-d-2       | DS | PTN1_HUMAN  | [26] |
| PTP1b-1bzh-flt-2.10-d-1       | DS | PTN1_HUMAN  | [26] |
| PTP1b-1bjz-pic-2.25-d-1       | DS | PTN1_HUMAN  | [26] |
| PTP1b-1c83-oai-1.80-d-1-s     | DS | PTN1_HUMAN  | [26] |
| PTP1b-1c83-oai-1.80-d-2       | DS | PTN1_HUMAN  | [26] |
| PTP1b-1c83-oai-1.80-d-2-s     | DS | PTN1_HUMAN  | [26] |
| PTP1b-1c84-761-2.35-d-1       | DS | PTN1_HUMAN  | [26] |
| PTP1b-1c84-761-2.35-d-1-s     | DS | PTN1_HUMAN  | [26] |
| PTP1b-1c84-761-2.35-d-2       | DS | PTN1_HUMAN  | [26] |
| PTP1b-1c84-761-2.35-d-2-s     | DS | PTN1_HUMAN  | [26] |
| PTP1b-1c84-761-2.35-d-3       | DS | PTN1_HUMAN  | [26] |
| PTP1b-1c84-761-2.35-d-3-s     | DS | PTN1_HUMAN  | [26] |
| PTP1b-1c85-oba-2.72-d-1       | DS | PTN1_HUMAN  | [26] |
| PTP1b-1c85-oba-2.72-d-1-s     | DS | PTN1_HUMAN  | [26] |
| PTP1b-1c86-opa-2.30-d-1       | DS | PTN1_HUMAN  | [26] |
| PTP1b-1c86-opa-2.30-d-1-s     | DS | PTN1_HUMAN  | [26] |
| PTP1b-1c87-opa-2.10-d-1       | DS | PTN1_HUMAN  | [26] |
| PTP1b-1c87-opa-2.10-d-1-s     | DS | PTN1_HUMAN  | [26] |
| PTP1b-1c88-ota-1.80-d-1       | DS | PTN1_HUMAN  | [26] |
| PTP1b-1ecv-878-1.95-d-1       | DS | PTN1_HUMAN  | [26] |

---

---

|                           |    |            |      |
|---------------------------|----|------------|------|
| PTP1b-1ecv-878-1.95-d-1-s | DS | PTN1_HUMAN | [26] |
| PTP1b-1ecv-878-1.95-d-2   | DS | PTN1_HUMAN | [26] |
| PTP1b-1ecv-878-1.95-d-2-s | DS | PTN1_HUMAN | [26] |
| PTP1b-1ecv-878-1.95-d-3   | DS | PTN1_HUMAN | [26] |
| PTP1b-1ecv-878-1.95-d-3-s | DS | PTN1_HUMAN | [26] |
| PTP1b-1g7g-inx-2.20-d-1   | DS | PTN1_HUMAN | [26] |
| PTP1b-1gfy-col-2.13-d-1   | DS | PTN1_HUMAN | [26] |
| PTP1b-1gfy-col-2.13-d-1-s | DS | PTN1_HUMAN | [26] |
| PTP1b-1jf7-tbh-2.20-d-1   | DS | PTN1_HUMAN | [26] |
| PTP1b-1kak-fnp-2.50-d-1   | DS | PTN1_HUMAN | [26] |
| PTP1b-1kak-fnp-2.50-d-2   | DS | PTN1_HUMAN | [26] |
| PTP1b-1l8g-dbd-2.50-d-1   | DS | PTN1_HUMAN | [26] |
| PTP1b-1nl9-989-2.40-d-1   | DS | PTN1_HUMAN | [26] |
| PTP1b-1nl9-989-2.40-d-1-s | DS | PTN1_HUMAN | [26] |
| PTP1b-1nny-515-2.40-d-1   | DS | PTN1_HUMAN | [26] |
| PTP1b-1no6-794-2.40-d-1   | DS | PTN1_HUMAN | [26] |
| PTP1b-1no6-794-2.40-d-1-s | DS | PTN1_HUMAN | [26] |
| PTP1b-1nwl-964-2.40-d-1   | DS | PTN1_HUMAN | [26] |
| PTP1b-1nwl-964-2.40-d-1-s | DS | PTN1_HUMAN | [26] |
| PTP1b-1nz7-901-2.40-d-1   | DS | PTN1_HUMAN | [26] |
| PTP1b-1ony-588-2.15-d-1   | DS | PTN1_HUMAN | [26] |
| PTP1b-1ony-588-2.15-d-1-s | DS | PTN1_HUMAN | [26] |
| PTP1b-1onz-968-2.40-d-1   | DS | PTN1_HUMAN | [26] |
| PTP1b-1onz-968-2.40-d-1-s | DS | PTN1_HUMAN | [26] |
| PTP1b-1ph0-418-2.20-d-1   | DS | PTN1_HUMAN | [26] |
| PTP1b-1ph0-418-2.20-d-2   | DS | PTN1_HUMAN | [26] |
| PTP1b-1ph0-418-2.20-d-2-s | DS | PTN1_HUMAN | [26] |
| PTP1b-1pxh-sna-2.15-d-1   | DS | PTN1_HUMAN | [26] |
| PTP1b-1pyn-941-2.20-d-1   | DS | PTN1_HUMAN | [26] |
| PTP1b-1q1m-234-2.60-d-1   | DS | PTN1_HUMAN | [26] |
| PTP1b-1q6j-335-2.20-d-1   | DS | PTN1_HUMAN | [26] |

---

---

|                           |    |            |      |
|---------------------------|----|------------|------|
| PTP1b-1q6j-335-2.20-d-1-s | DS | PTN1_HUMAN | [26] |
| PTP1b-1q6m-p27-2.20-d-1   | DS | PTN1_HUMAN | [26] |
| PTP1b-1q6m-p27-2.20-d-1-s | DS | PTN1_HUMAN | [26] |
| PTP1b-1q6n-p90-2.10-d-1   | DS | PTN1_HUMAN | [26] |
| PTP1b-1q6n-p90-2.10-d-1-s | DS | PTN1_HUMAN | [26] |
| PTP1b-1q6p-213-2.30-d-1   | DS | PTN1_HUMAN | [26] |
| PTP1b-1q6s-214-2.20-d-1   | DS | PTN1_HUMAN | [26] |
| PTP1b-1q6s-214-2.20-d-1-s | DS | PTN1_HUMAN | [26] |
| PTP1b-1q6t-600-2.30-d-1   | DS | PTN1_HUMAN | [26] |
| PTP1b-1qxk-429-2.30-d-1   | DS | PTN1_HUMAN | [26] |
| PTP1b-2bgd-t1d-2.40-d-1   | DS | PTN1_HUMAN | [26] |
| PTP1b-2cne-dfj-1.80-d-1   | DS | PTN1_HUMAN | [26] |
| PTP1b-2cne-dfj-1.80-d-1-s | DS | PTN1_HUMAN | [26] |
| PTP1b-2cne-dfj-1.80-d-2   | DS | PTN1_HUMAN | [26] |
| PTP1b-2cne-dfj-1.80-d-2-s | DS | PTN1_HUMAN | [26] |
| PTP1b-2cnf-f32-2.20-d-1   | DS | PTN1_HUMAN | [26] |
| PTP1b-2cnf-f32-2.20-d-1-s | DS | PTN1_HUMAN | [26] |
| PTP1b-2cnf-f32-2.20-d-2   | DS | PTN1_HUMAN | [26] |
| PTP1b-2cnf-f32-2.20-d-2-s | DS | PTN1_HUMAN | [26] |
| PTP1b-2cng-ize-1.90-d-1   | DS | PTN1_HUMAN | [26] |
| PTP1b-2cng-ize-1.90-d-1-s | DS | PTN1_HUMAN | [26] |
| PTP1b-2cnh-izb-1.80-d-1   | DS | PTN1_HUMAN | [26] |
| PTP1b-2cnh-izb-1.80-d-1-s | DS | PTN1_HUMAN | [26] |
| PTP1b-2cni-izf-2.00-d-1   | DS | PTN1_HUMAN | [26] |
| PTP1b-2cni-izf-2.00-d-1-s | DS | PTN1_HUMAN | [26] |
| PTP2b-1g7f-inz-1.80-d-1   | DS | PTN1_HUMAN | [26] |
| LS3-03b-1C85-1-model      | LS | PTN1_HUMAN | [26] |
| LS3-03b-1C85-2-model      | LS | PTN1_HUMAN | [26] |
| LS3-03b-1PH0-model        | LS | PTN1_HUMAN | [26] |
| LS3-03b-1PYN-model        | LS | PTN1_HUMAN | [26] |
| LS3-03b-1Q6S-model        | LS | PTN1_HUMAN | [26] |

---

|                                                                             |    |              |      |
|-----------------------------------------------------------------------------|----|--------------|------|
| LS3-03b-1T49-model                                                          | LS | PTN1_HUMAN   | [26] |
| LS3-03b-2CM7-model                                                          | LS | PTN1_HUMAN   | [26] |
| LS3-03b-2CNG-model                                                          | LS | PTN1_HUMAN   | [26] |
| LS3-03b-2F71-model                                                          | LS | PTN1_HUMAN   | [26] |
| LS3-03b-2QBS-model                                                          | LS | PTN1_HUMAN   | [26] |
| IKK2-3rzf-xnm-4.00-n-1                                                      | DS | Q6INT1_XENLA | [27] |
| IKK2-N001-6                                                                 | DS | Q6INT1_XENLA | [27] |
| 5a-red-R003-2                                                               | DS | S5A2_HUMAN   | [28] |
| 5a-red-R003-4                                                               | DS | S5A2_HUMAN   | [28] |
| STS-LS3.12-model10-mostafa-2012a-21-maltais-2009a-55-XVols-binding-site     | LS | STS_HUMAN    | [29] |
| STS-LS3.12-model11-lehr-2005a-4f-nussbaumer-2003b-6g                        | LS | STS_HUMAN    | [29] |
| STS-LS3.12-model12-mostafa-2012a-21-maltais-2009a-55-XVols-binding-site-HBD | LS | STS_HUMAN    | [29] |

<sup>1</sup> not published. <sup>2</sup> in preparation.

## S-2. Supplementary Figures



**Figure S 1.** Enrichment of known DHC targets (known DHC biological space) in differently scored predictions for DHC chemical space. (A) Predictions made with stand-alone Ph-DB. (B) Predictions made with SEA, STP, and SP combined, and all four approaches combined with the consensus score of two (C) and three applied (D). Previously known DHC targets are highlighted with green, and targets selected for in vitro evaluation during this study with red overlays.

## Metrics Computed for the Isolated and Combined Target Prediction Tools

| Metric                                  |             | AKRIC3 | 17β HSD3 | 17β HSD2 | Aromatase | 5-LO | COX-1 | Mean |
|-----------------------------------------|-------------|--------|----------|----------|-----------|------|-------|------|
| Consensus Score (CS)                    | Recall      | 1.00   | 0        | 0        | 0         | 0.86 | 0.75  | 0.44 |
|                                         | Precision   | 0.67   | 0        | 0        | 0         | 0.86 | 0.50  | 0.34 |
|                                         | Relative EF | 0.67   | 0        | 0        | 0         | 0.86 | 0.50  | 0.34 |
| pharmacophore-based parallel VS (Ph-DB) | Recall      | 0      | 0        | 0        | 0         | 0.57 | 0.50  | 0.18 |
|                                         | Precision   | 0      | 0        | 0        | 0         | 0.80 | 0.50  | 0.22 |
|                                         | Relative EF | 0      | 0        | 0        | 0         | 0.80 | 0.50  | 0.22 |
| Similarity Ensemble Approach (SEA)      | Recall      | 1.00   | 0        | 0        | 0         | 0.29 | 0     | 0.22 |
|                                         | Precision   | 0.67   | 0        | 0        | 0         | 0.67 | 0     | 0.22 |
|                                         | Relative EF | 0.67   | 0        | 0        | 0         | 0.67 | 0     | 0.22 |
| SwissTarget Prediction (STP)            | Recall      | 0      | 0        | 0        | 0         | 0.29 | 0.25  | 0.27 |
|                                         | Precision   | 0      | 0        | 0        | 0         | 0.67 | 0.50  | 0.20 |
|                                         | Relative EF | 0      | 0        | 0        | 0         | 0.67 | 0.50  | 0.20 |
| SuperPred (SP)                          | Recall      | 0      | 0        | 0        | 0         | 0    | 0     | 0    |
|                                         | Precision   | 0      | 0        | 0        | 0         | 0    | 0     | 0    |
|                                         | Relative EF | 0      | 0        | 0        | 0         | 0    | 0     | 0    |

### True/False Positives/Negatives

True Positives (TPs) refer to actives that were predicted as active, while False Positives (FPs) refer to inactive that were predicted as active. Vice versa, True Negatives (TNs) are inactive predicted as active, while False Negatives (FNs) are active predicted as inactive.

### Recall/Sensitivity

Proportion of true actives a model is able to retrieve from the screening dataset (0 - 1).

$$recall = \frac{TP}{TP + FN}$$

### Precision

Proportion of true actives in a hitlist produced by a model (0 - 1).

$$precision = \frac{TP}{TP + FP}$$

### Relative Enrichment Factor

Ability of a model to enrich a hitlist with true positive predictions (0 - 1).

$$relative\ EF = \frac{TP}{TP + FP} \div \frac{1}{\frac{actives}{inactives}}$$

**Figure S 2.** Metrics computed for the isolated and combined target prediction tools.



**Figure S 3.** Six potential protein targets for DHCs input to STRING, which creates a network of both direct and functional protein-protein interactions [30].



**Figure S 4.** Results of other protein targets tested in the course of this study due to assay availability shown as bar charts. Compounds 1 – 10 indicated with the respective means ( $n = 3$ ) of percent inhibition at 10  $\mu$ M (0 – 100%) and standard deviation. Black dashed line again indicates arbitrarily chosen 30% activity cut-off. DMSO was used to measure baseline enzyme activities, on which samples were normalized (not shown) and positive controls (PC) were used as indicated in Materials and Methods.



**Figure S 5.** Pipeline Pilot protocol '*chemdraw\_to\_sd\_smiles\_fabian.xml*' used to convert ChemDraw's native file format '*.cdx*' to an '*.sdf*'-file and a '*.csv*' table with isomeric smiles codes while maintaining issued stereochemistry. Removal of duplicate entries is necessary, since various names of the compounds can be found in literature, and consequently in the hand-drawn library. The protocol is further provided on GitHub ([https://github.com/fmayr/DHC\\_TargetPrediction](https://github.com/fmayr/DHC_TargetPrediction)).

**Table S 2.** Parameter settings used for the Ligand Profiler protocol used in parallel VS with Discovery Studio.

| Protocol Settings              | Protocol.pr.xml                     |
|--------------------------------|-------------------------------------|
|                                | Input Ligands <u>DHC_full.sdf</u>   |
|                                | Input LigandProfilerDB              |
|                                | Pharmacophores                      |
|                                | Input PharmaDB Pharmacophores       |
| Model Selection                | Most Selective                      |
|                                | Conformation Generation <u>BEST</u> |
| Maximum Conformations          | 255                                 |
| Discard Existing Conformations | WAHR                                |
| Energy Threshold               | 20                                  |
| Ring Fragments File            |                                     |
| Save Conformations             | FALSCH                              |
|                                | Advanced                            |
| Input Type                     | Ligands                             |
| Input Database                 | Sample                              |
| Input Database Limit Hits      | First N                             |
| Input Database Maximum         | 300                                 |
| Input Database Hitlist         |                                     |
| Fitting Method                 | Rigid                               |
| Maximum Omitted Features       | 0                                   |
| Minimum Interfeature Distance  | 0.00001                             |
| Scale Fit Values               | WAHR                                |
| Prune Empty Fits               | WAHR                                |
| Prune Missed Molecules         | WAHR                                |
| Keep Input Conformations       | FALSCH                              |
| Save Aligned Ligands           | FALSCH                              |

---

|                         |                     |        |
|-------------------------|---------------------|--------|
| Activity Property       |                     |        |
| Catalyst Parameter File |                     |        |
|                         | Parallel Processing | FALSCH |

---

### S-3. File Scheme

**Table S 3.** Files used and produced during this study. Every file is freely available at GitHub ([https://github.com/fmayr/DHC\\_TargetPrediction](https://github.com/fmayr/DHC_TargetPrediction)). For greater clarity, a file scheme is provided in Supplementary Information S-2 describing all dependencies.

| File Name                                 | Contains                                                                                                                                                            | Subfolder                        |
|-------------------------------------------|---------------------------------------------------------------------------------------------------------------------------------------------------------------------|----------------------------------|
| DHC_full.csv                              | DHC chemical space as csv-file (name, smiles).                                                                                                                      | /dataset                         |
| DHC_full.sdf                              | DHC chemical space as 3D-molecule files.                                                                                                                            | /dataset                         |
| DHC_full_lit_network.csv                  | Known DHC biological space and result of bioactivity mining. Ready to be imported to Cytoscape.                                                                     | /bioactivity%20mining            |
| DHC_full_online.csv                       | Result produced by online target prediction servers (SEA, STP, SP) and DHC_full.csv as input.                                                                       | /TarPredCrawler                  |
| DHC_full_LS_mergedhits.csv                | Csv-file of hitlists produced by LigandScout models in Ph-DB.                                                                                                       | /pharmacophore-based parallel VS |
| DHC_full_ligandprofiler.csv               | Csv-file of hitlists produced by Discovery Studio model in Ph-DB.                                                                                                   | /pharmacophore-based parallel VS |
| DHC_full_inhouse.csv                      | Joined results of LigandScout and Discovery Studio outputs.                                                                                                         | /pharmacophore-based parallel VS |
| DHC_full_pivoted.csv                      | Joined results of SEA, STP, SP, and Ph-DB predictions for DHC chemical space.                                                                                       |                                  |
| DHC_10_pivoted.csv                        | DHC_full_pivoted.csv filtered for compounds 1 – 10.                                                                                                                 |                                  |
| DHC_10_network.csv                        | DHC_10_pivoted.csv joined with DHC_full_lit_network.csv. Network file ready to be imported to Cytoscape. Contains known and predicted compound-target associations. |                                  |
| Bioactivity_network_generator_SMILES.py   | Python script used for literature mining. For installation instruction see README.                                                                                  |                                  |
| TarPredCrawler.py                         | Python script used for submitting and collecting results from SEA, STP, and SP.                                                                                     |                                  |
| DHC_targetprediction_data_treatment.ipynb | Jupyter Notebook containing all data treatment and plotting performed in this study.                                                                                |                                  |



**Figure S 6.** File scheme describing the course of this study. All files are available for download on GitHub ([https://github.com/fmayr/DHC\\_TargetPrediction](https://github.com/fmayr/DHC_TargetPrediction)), relative paths are written in italics.

### S-4. Quality Control of Compounds 1-10



Figure S 7. Phloretin (1) CAS: 60-82-2



Figure S 8. 3-OH-phloretin (2) CAS: 57765-66-9



**Figure S 9.** 2',6'-dihydroxy-4'-methoxy DHC (3) CAS: 35241-55-5



**Figure S 10.** Asebogenin (4) CAS: 35241-54-4



**Figure S 11.** Calomelaten (5) CAS: 520-42-3



**Figure S 12.** Sieboldin (6) CAS: 18777-73-6



**Figure S 13.** Phloridzin (7) CAS: 60-81-1



**Figure S 14.** Trilobatin (8) CAS: 4192-90-9.



**Figure S 15.** Phloretin-2'-xyloglucoside (9) CAS: 145758-09-4.



**Figure S 16.** Neohesperidin DHC (10) CAS: 20702-77-6.

## S-5. Positive Controls

Table S 4. Positive controls used during this study.

| Assay                              | Name                                 | CAS              | Structure                                                                            | Ref.    |
|------------------------------------|--------------------------------------|------------------|--------------------------------------------------------------------------------------|---------|
| 3 $\beta$ HSD1                     | Trilostane                           | 13647-35-3       |    | [31,32] |
| 11 $\beta$ HSD1<br>11 $\beta$ HSD2 | 18 $\beta$ -<br>Glycyrrhetic<br>acid | 471-53-4         |    | [33]    |
| 17 $\beta$ HSD2<br>17 $\beta$ HSD4 | compound 19                          | 1340482-23-<br>6 |    | [34]    |
| 17 $\beta$ HSD3                    | compound 24                          | 873206-61-2      |   | [35]    |
| 5-LO                               | Zileuton                             | 111406-87-2      |  | [36]    |
| aromatase                          | anastrozole                          | 120511-73-1      |  | [37]    |
| AKR1C3                             | compound 2-9                         | 745028-76-6      |  | [3]     |
| COX-1                              | Indomethacin                         | 53-86-1          |  | [38]    |
| CYP17A1                            | Abiraterone                          | 154229-19-3      |  | [31,32] |

sEH

AUDA

479413-70-2

[14]



## S-6. Referneces

1. Kurzemann, F. Pharmacophore modeling and virtual screening for 3 $\beta$ -hydroxysteroid-dehydrogenase inhibitors. Innsbruck, Leopold-Franzens Universität Innsbruck, 2016.
2. Rollinger, J.M.; Schuster, D.; Danzl, B.; Schwaiger, S.; Markt, P.; Schmidtke, M.; Gertsch, J.; Raduner, S.; Wolber, G.; Langer, T., et al. In silico target fishing for rationalized ligand discovery exemplified on constituents of *Ruta graveolens*. *Planta Med.* **2009**, *75*, 195-204, doi:10.1055/s-0028-1088397.
3. Schuster, D.; Kowalik, D.; Kirchmair, J.; Laggner, C.; Markt, P.; Aebischer-Gumy, C.; Ströhle, F.; Möller, G.; Wolber, G.; Wilckens, T., et al. Identification of chemically diverse, novel Inhibitors of 17 beta hydroxysteroid dehydrogenase type 3 and 5 pharmacophore-based virtual screening. *J. Steroid Biochem. Mol. Biol.* **2011**, *125*, 148-161.
4. Temml, V.; Garscha, U.; Romp, E.; Schubert, G.; Gerstmeier, J.; Kutil, Z.; Matuszczak, B.; Waltenberger, B.; Stuppner, H.; Werz, O., et al. Discovery of the first dual inhibitor of the 5-lipoxygenase-activating protein and soluble epoxide hydrolase using pharmacophore-based virtual screening. *Sci. Rep.* **2017**, *7*, 42751.
5. Akram, M.; Patt, M.; Kaserer, T.; Temml, V.; Waratchareeyakul, W.; Kratschmar, D.V.; Hauptenthal, J.; Hartmann, R.W.; Odermatt, A.; Schuster, D. Identification of the fungicide epoxiconazole by virtual screening and biological assessment as inhibitor of human 11 $\beta$ -hydroxylase and aldosterone synthase. *J. Steroid Biochem. Mol. Biol.* **2019**, *192*, 105358, doi:<https://doi.org/10.1016/j.jsbmb.2019.04.007>.
6. Schuster, D.; Laggner, C.; Steindl, T.; Paluszczak, A.; Hartmann, R.; Langer, T. Pharmacophore modeling and in silico Screening for new P450 19 (Aromatase) inhibitors. *J. Chem. Inf. Model.* **2006**, *46*, 1301-1311.
7. Hochleitner, J.; Akram, M.; Ueberall, M.; Davis, R.A.; Waltenberger, B.; Stuppner, H.; Sturm, S.; Ueberall, F.; Gostner, J.M.; Schuster, D. A combinatorial approach for the discovery of cytochrome P450 2D6 inhibitors from nature. *Sci. Rep.* **2017**, *7*, 8071, doi:10.1038/s41598-017-08404-0.
8. Vuorinen, A.; Engeli, R.T.; Leugger, S.; Bachmann, F.; Akram, M.; Atanasov, A.G.; Waltenberger, B.; Temml, V.; Stuppner, H.; Krenn, L., et al. Potential antiosteoporotic natural product lead compounds that inhibit 17 $\beta$ -hydroxysteroid dehydrogenase type 2. *J. Nat. Prod.* **2017**, *80*, 965-974, doi:10.1021/acs.jnatprod.6b00950.
9. Fiala, J. Pharmacophore modeling and virtual screening for 17 $\beta$ -hydroxysteroid dehydrogenase 7 inhibitors. Leopold-Franzens Universität Innsbruck, Innsbruck, 2017.
10. Vuorinen, A.; G., N.L.; Odermatt, A.; M., R.J.; Schuster, D. Pharmacophore model refinement for 11 $\beta$ -hydroxysteroid dehydrogenase inhibitors: search for modulators of intracellular glucocorticoid concentrations. *Mol. Inf.* **2013**, *33*, 15-25, doi:10.1002/minf.201300063.
11. Kratschmar, D.V.; Vuorinen, A.; Da Cunha, T.; Wolber, G.; Classen-Houben, D.; Doblhoff, O.; Schuster, D.; Odermatt, A. Characterization of activity and binding mode of glycyrrhetic acid derivatives inhibiting 11 $\beta$ -hydroxysteroid dehydrogenase type 2. *The Journal of Steroid Biochemistry and Molecular Biology* **2011**, *125*, 129-142, doi:<https://doi.org/10.1016/j.jsbmb.2010.12.019>.
12. Brunner, F. A Pharmacophore model collection for estrogen receptor ligands using ligandscout. Leopold-Franzens Universität Innsbruck, Innsbruck, 2011.
13. Linder, T. Pharmacophore modeling and virtual screening for glucocorticoid receptor ligands: unraveling anti-inflammatory or endocrine disrupting effects of chemicals. Leopold-Franzens Universität Innsbruck, Innsbruck, 2010.

14. Waltenberger, B.; Garscha, U.; Temml, V.; Liers, J.; Werz, O.; Schuster, D.; Stuppner, H. Discovery of potent soluble Epoxide hydrolase (sEH) Inhibitors by pharmacophore-based virtual screening. *J. Chem. Inf. Model.* **2016**, *56*, 747-762, doi:10.1021/acs.jcim.5b00592.
15. Noha, S.M. Application of 3D virtual screening techniques for the identification of novel anti-inflammatory plant constituents. Leopold-Franzens Universität Innsbruck, Innsbruck, 2013.
16. Walzl, M. Molecular modeling-based analysis of 5-lipoxygenase inhibitors : common feature pharmacophore modeling and virtual screening. Leopold-Franzens Universität Innsbruck, Innsbruck, 2010.
17. Praxmarer, L. Structure- and ligand-based pharmacophore modeling for mineralocorticoid receptor ligands. Leopold-Franzens Universität Innsbruck, Innsbruck, 2011.
18. Humer, K. 3D - pharmacophore modeling for kinases involved in inflammation. Leopold-Franzens Universität Innsbruck, Innsbruck, 2009.
19. von Grafenstein, S.; Mihaly-Bison, J.; Wolber, G.; Bochkov, V.N.; Liedl, K.R.; Schuster, D. Identification of novel liver X receptor activatos by structure-based modeling. *J. Chem. Inf. Model* **2012**, *52*, 1391-1400, doi:10.1021/ci300096c.
20. Schuster, D.; Markt, P.; Grienke, U.; Mihaly-Bison, J.; Binder, M.; Noha, S.M.; Rollinger, J.M.; Stuppner, H.; Bochkov, V.N.; Wolber, G. Pharmacophore-based discovery of FXR agonists. Part I: Model development and experimental validation. *Bioorg. Med. Chem.* **2011**, *19*, 7168-7180.
21. Noha, S.M.; Jazzar, B.; Kuehnl, S.; Rollinger, J.M.; Stuppner, H.; Schaible, A.M.; Werz, O.; Wolber, G.; Schuster, D. Pharmacophore-based discovery of a novel cytosolic phospholipase A2 $\alpha$  inhibitor. *Bioorg. Med. Chem. Lett.* **2012**, *22*, 1202-1207, doi:<https://doi.org/10.1016/j.bmcl.2011.11.093>.
22. Temml, V.; Kaserer, T.; Kutil, Z.; Landa, P.; Vanek, T.; Schuster, D. Pharmacophore modeling for COX-1 and -2 Inhibitors with LigandScout in comparison to Discovery Studio. *Future Med. Chem.* **2014**, *6*, 1869-1881.
23. Schuster, D.; Waltenberger, B.; Kirchmair, J.; Distinto, S.; Markt, P.; Stuppner, H.; Rollinger, J.M.; Wolber, G. Predicting cyclooxygenase inhibition by three-dimensional pharmacophore profiling. Part I: Model generation, Validation and applicability in ethnopharmacology. *Mol. Inf.* **2010**, *29*, 75-86, doi:10.1002/minf.200900071.
24. Markt, P. 3D Virtual high-throughput screening : discovery of novel lead structures and validation of the parallel screening approach with focus on targets involved in the metabolic syndrome . Kapitel 3 auch erschienen in: Journal of Computer-aided Molecular Design, 2008, online, doi: 10.1007/s10822-007-9163-6, als Artikel sobald wie möglich / Kapitel 4 auch erschienen in: Journal of Computer-aided Molecular Design, 2007, Band 10-11, Seiten 575-590. Leopold-Franzens Universität Innsbruck, Innsbruck, 2008.
25. Noha, S.M.; Fischer, K.; Koeberle, A.; Garscha, U.; Werz, O.; Schuster, D. Discovery of novel, non-acidic mPGES-1 Inhibitors by virtual Screening with multistep protocol. *Bioorg. Med. Chem.* **2015**, *23*, 4839-4845.
26. Herdlinger, S. Computer-assisted structure-activity studies on protein tyrosine phosphatase 1B (PTP1B)-inhibitors. Leopold-Franzens Universität Innsbruck, Innsbruck, 2016.
27. Noha, S.M.; Atanasov, A.G.; Schuster, D.; Markt, P.; Fakhruddin, N.; Heiss, E.H.; Schrammel, O.; Rollinger, J.M.; Stuppner, H.; Dirsch, V.M., et al. Discovery of a novel IKK- $\beta$  inhibitor by ligand-based virtual screening techniques. *Bioorg. Med. Chem. Lett.* **2011**, *21*, 577-583, doi:<https://doi.org/10.1016/j.bmcl.2010.10.051>.

28. Rhöse, S.G. Pharmacophore modeling of antiproliferative compounds: estrogen receptor subtype-selective ligands and steroid 5 $\alpha$  reductase inhibitors. Leopold-Franzens Universität Innsbruck, Innsbruck, 2010.
29. Grienke, U.; Kaserer, T.; Kirchweger, B.; Lambrinidis, G.; Kandel, R.T.; Foster, P.A.; Schuster, D.; Mikros, E.; Rollinger, J.M. Steroid sulfatase inhibiting lanostane triterpenes – Structure activity relationship and in silico insights. *Bioorg. Chem.* **2020**, *95*, 103495, doi:<https://doi.org/10.1016/j.bioorg.2019.103495>.
30. Szklarczyk, D.; Gable, A.L.; Lyon, D.; Junge, A.; Wyder, S.; Huerta-Cepas, J.; Simonovic, M.; Doncheva, N.T.; Morris, J.H.; Bork, P., et al. STRING v11: protein–protein association networks with increased coverage, supporting functional discovery in genome-wide experimental datasets. *Nucleic Acids Research* **2018**, *47*, D607–D613, doi:10.1093/nar/gky1131.
31. Udhane, S.S.; Parween, S.; Kagawa, N.; Pandey, A.V. Altered CYP19A1 and CYP3A4 activities due to mutations A115V, T142A, Q153R and P284L in the human P450 oxidoreductase. *Front. Pharmacol.* **2017**, *8*, doi:10.3389/fphar.2017.00580.
32. Samandari, E.; Kempná, P.; Nuoffer, J.-M.; Hofer, G.; E. Mullis, P.; E. Flück, C. Human adrenal corticocarcinoma NCI-H295R cells produce more androgens than NCI-H295A cells and differ in 3 $\beta$ -hydroxysteroid dehydrogenase type 2 and 17,20 lyase activities. *J. Endocrinol.* **2007**, *195*, 459–472, doi:10.1677/JOE-07-0166.
33. Kratschmar, D.V.; Vuorinen, A.; Da Cunha, T.; Wolber, G.; Classen-Houben, D.; Doblhoff, O.; Schuster, D.; Odermatt, A. Characterization of activity and binding mode of glycyrrhetic acid derivatives inhibiting 11 $\beta$ -hydroxysteroid dehydrogenase type 2. *J. Steroid Biochem. Mol. Biol.* **2011**, *125*, 129–142, doi:<https://doi.org/10.1016/j.jsbmb.2010.12.019>.
34. Wetzell, M.; Marchais-Oberwinkler, S.; Perspicace, E.; Möller, G.; Adamski, J.; Hartmann, R.W. Introduction of an electron withdrawing group on the hydroxyphenyl naphthol scaffold improves the potency of 17 $\beta$ -hydroxysteroid dehydrogenase type 2 (17 $\beta$ -HSD2) inhibitors. *J. Med. Chem.* **2011**, *54*, 7547–7557, doi:10.1021/jm2008453.
35. Möller, G.; Deluca, D.; Gege, C.; Rosinus, A.; Kowalik, D.; Peters, O.; Droescher, P.; Elger, W.; Adamski, J.; Hillisch, A. Structure-based design, synthesis and in vitro characterization of potent 17 $\beta$ -hydroxysteroid dehydrogenase type 1 inhibitors based on 2-substitutions of estrone and D-homoestrone. *Bioorg. Med. Chem. Lett.* **2009**, *19*, 6740–6744, doi:<https://doi.org/10.1016/j.bmcl.2009.09.113>.
36. Koeberle, A.; Siemoneit, U.; Bühring, U.; Northoff, H.; Laufer, S.; Albrecht, W.; Werz, O. Licofelone suppresses prostaglandin E<sub>2</sub> formation by interference with the inducible microsomal prostaglandin E<sub>2</sub> synthase-1. *J. Pharmacol. Exp. Ther.* **2008**, *326*, 975, doi:10.1124/jpet.108.139444.
37. Pandey, A.V.; Kempná, P.; Hofer, G.; Mullis, P.E.; Flück, C.E. Modulation of human CYP19A1 activity by mutant NADPH P450 oxidoreductase. *Mol. Endocrinol.* **2007**, *21*, 2579–2595, doi:10.1210/me.2007-0245.
38. Schaible, A.M.; Filosa, R.; Temml, V.; Krauth, V.; Matteis, M.; Peduto, A.; Bruno, F.; Luderer, S.; Roviezzo, F.; Di Mola, A., et al. Elucidation of the molecular mechanism and the efficacy in vivo of a novel 1,4-benzoquinone that inhibits 5-lipoxygenase. *Br. J. Pharmacol.* **2014**, *171*, 2399–2412, doi:10.1111/bph.12592.
